# Supplementary material for: The unprecedented bridging coordination mode of 1,1-cyclobutane dicarboxylate (µ-cbdc-O,O′) stabilized by intramolecular hydrogen bonds in ruthenium(ii) complexes
Source: Royal Society of Chemistry journal article supplement (doi:10.1039/b503412d), 2005-01-01

**The unprecedented bridging coordination mode of 1,1-cyclobutane dicarboxylate ( $\mu$ -cbdc-*O,O'*) stabilized by intramolecular hydrogen bonds in ruthenium(II) complexes**

---

**Ioannis Bratsos,<sup>a</sup> Ennio Zangrando,<sup>b</sup> Barbara Serli,<sup>b</sup> Nikos Katsaros,<sup>a</sup> and Enzo Alessio<sup>\*b</sup>**

<sup>a</sup> *Institute of Physical Chemistry, NCSR "Demokritos", 15310 Ag. Paraskevi, Athens, Greece. Fax: +30 210 6511766; Tel: +30 210 6503624; E-mail: bratsos@chem.demokritos.gr*

<sup>b</sup> *Dipartimento di Scienze Chimiche, Università di Trieste, Via L. Giorgieri 1, 34127 Trieste, Italy. Fax: +39 040 5583903; Tel: +39 040 5583961; E-mail: alessi@univ.trieste.it*

**Electronic supplementary information**

Fig. S1. HMQC 2D NMR spectrum of **2** in D<sub>2</sub>O.

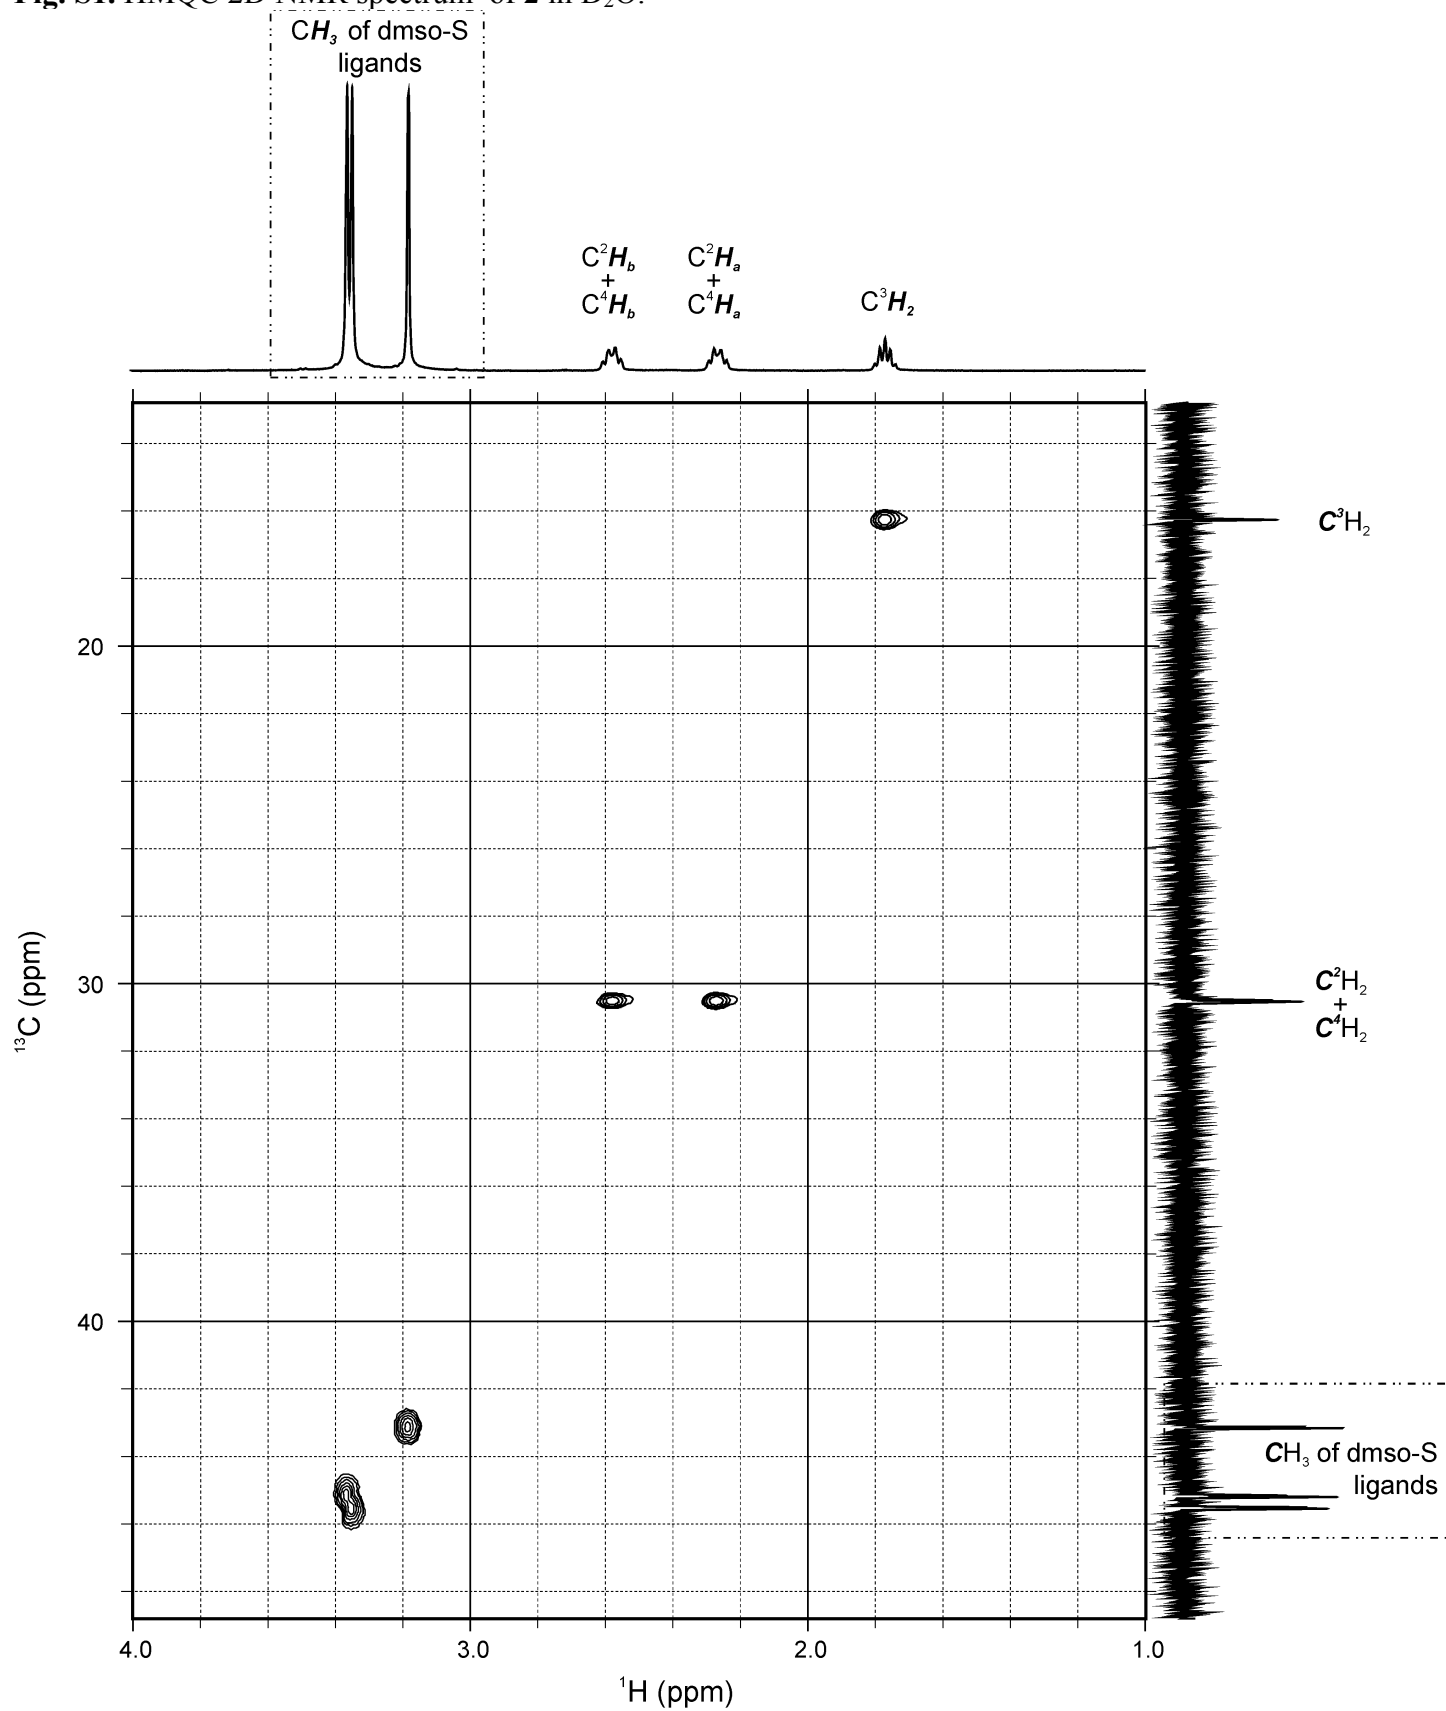

Fig. S2. HMQC 2D NMR spectrum of **5** in D<sub>2</sub>O.

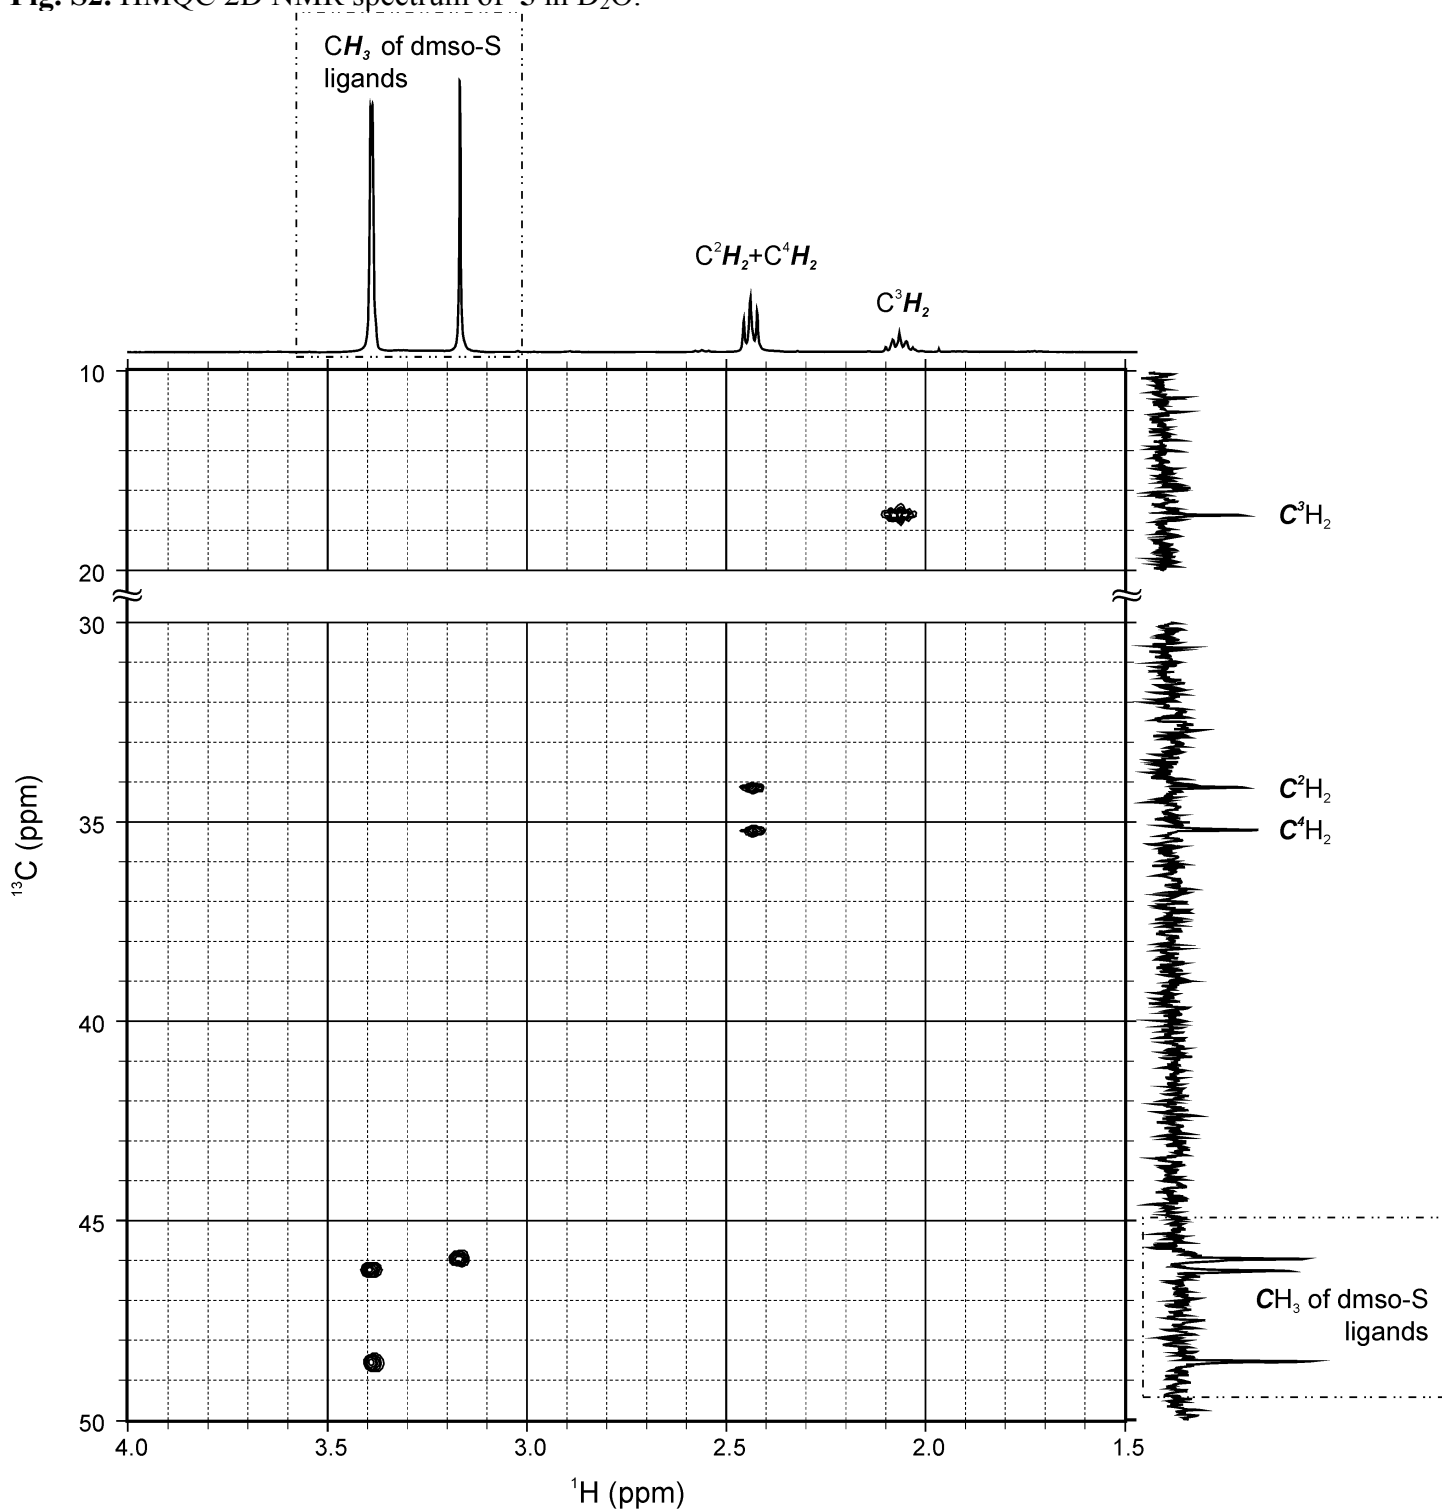

**Fig. S3.**  $^1\text{H}$  NMR spectral changes during the hydrolysis of **5** in  $\text{D}_2\text{O}$ : dmsO-S region (left) and cbc region (right). The labels \* and \*\* indicate the resonances of **5a** and **2**, respectively.

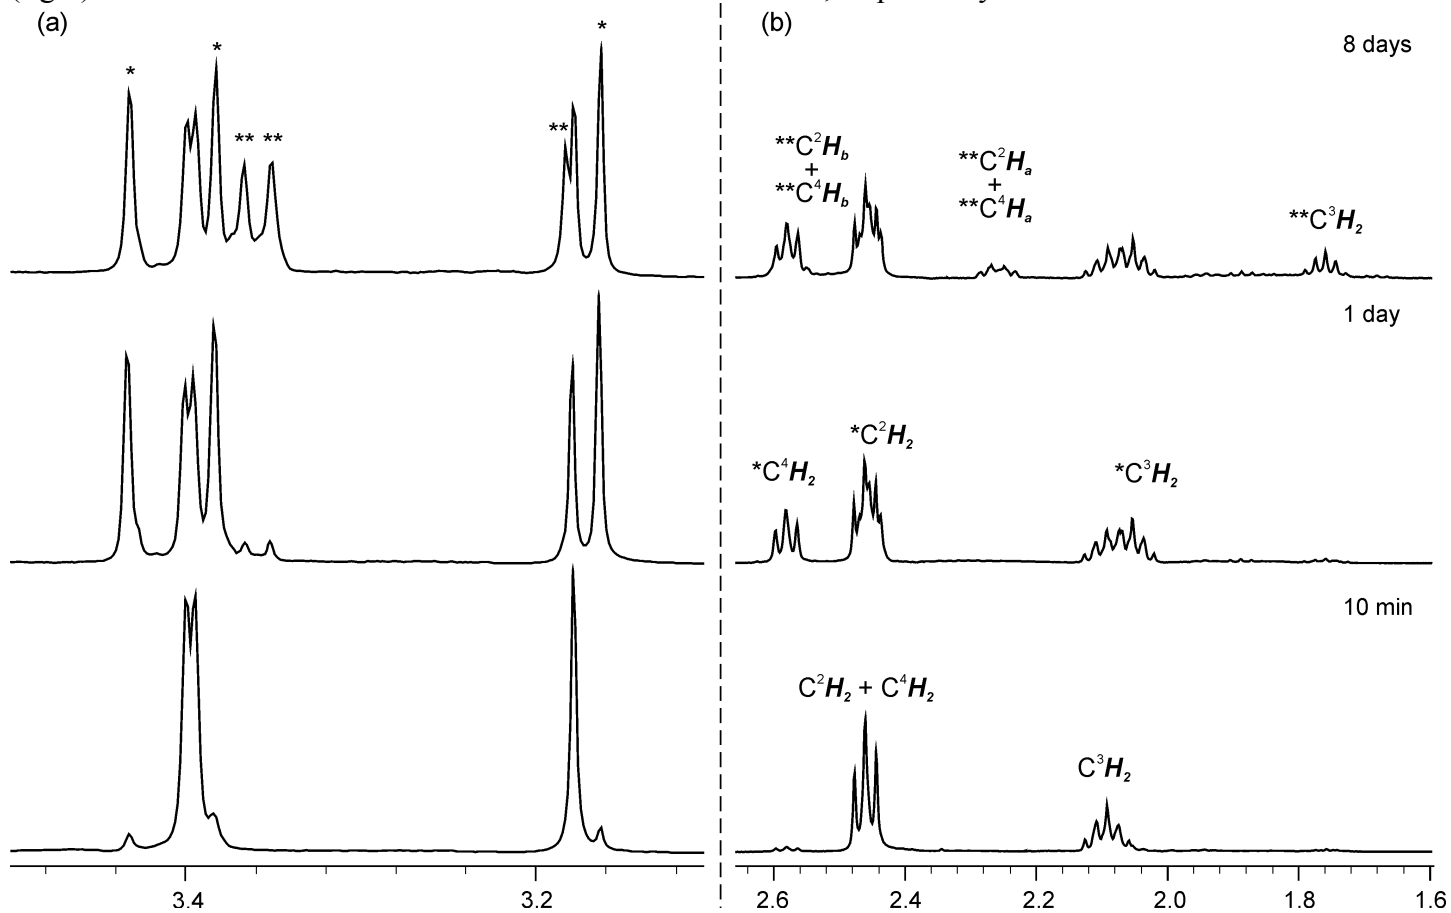

Fig. S4. HMQC 2D NMR spectrum of **5** (cbdc region) in D<sub>2</sub>O after 8 days.

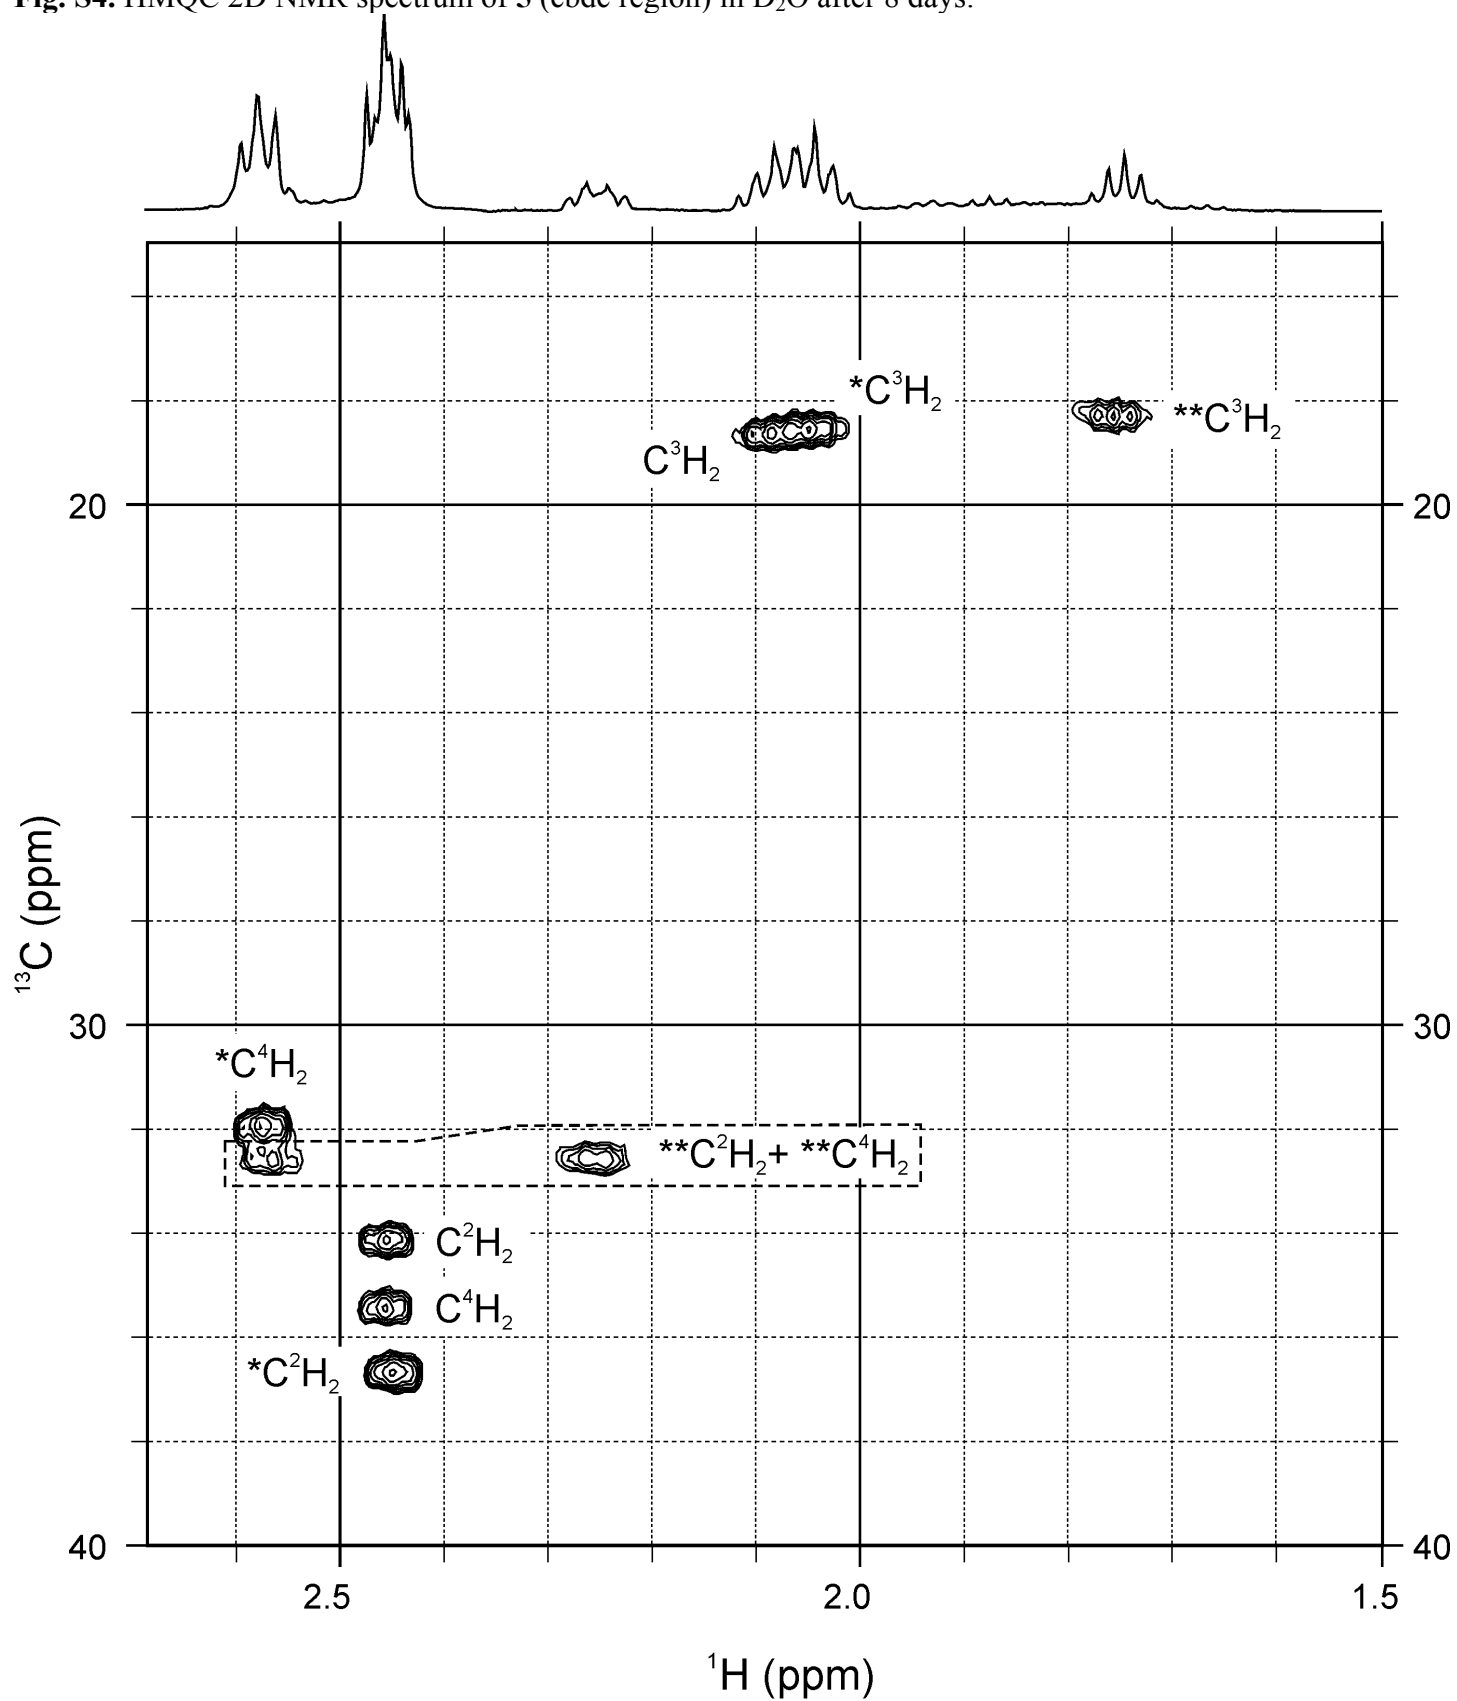

**Fig. S5.** HMQC NMR spectrum of **5** (dmso-S region) in D<sub>2</sub>O after 8 days.

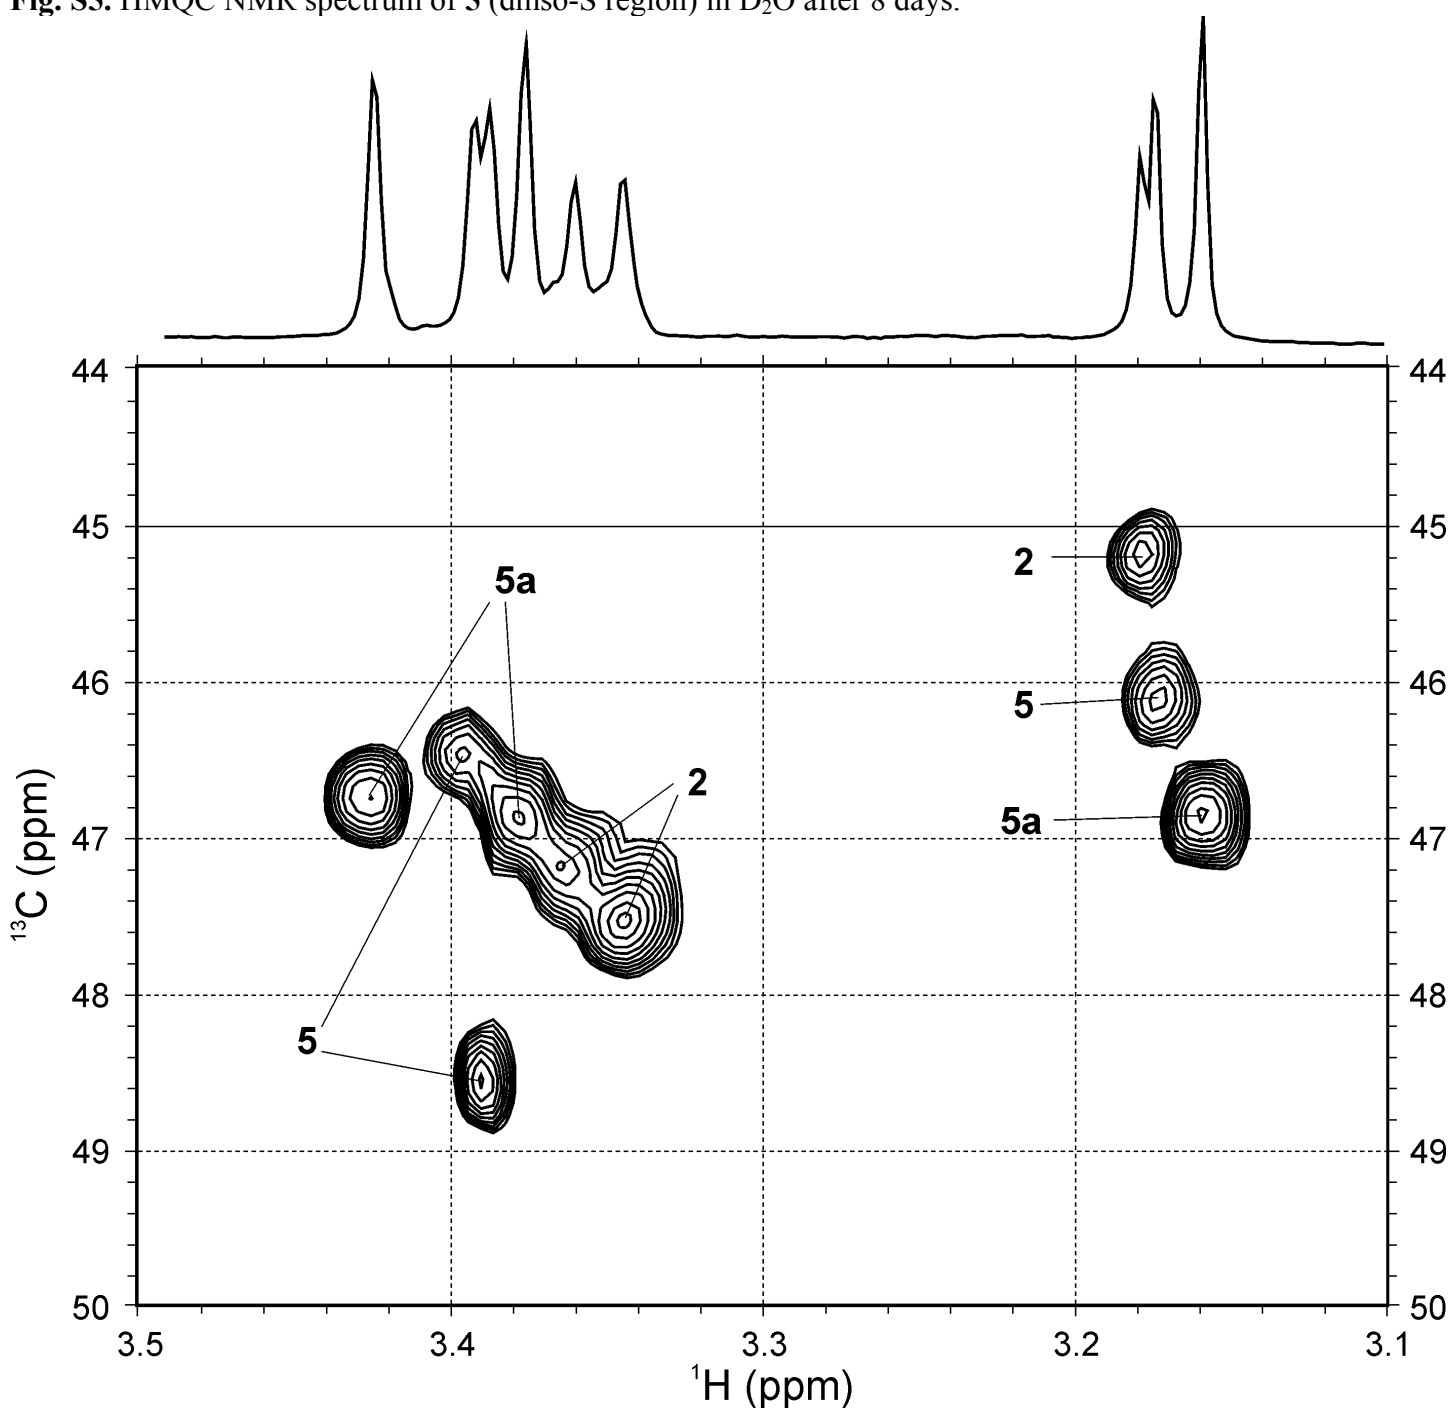

Supplement: b503412d.pdf [file b503412d.pdf]
